# Supplementary material for: Leishmania infantum UBC1 in Metacyclic Promastigotes from Phlebotomus perniciosus, a Vaccine Candidate for Zoonotic Visceral Leishmaniasis
Source: MDPI journal article supplement (doi:10.3390/vaccines10020231), 2022-02-03
Supplement: s1 [file s1]

|                 |     |                                                                                          |                                                 |                                        |
|-----------------|-----|------------------------------------------------------------------------------------------|-------------------------------------------------|----------------------------------------|
| L.infantum      | 1   | MPLTAACMRRLMROMQEVEQEHFV                                                                 | DGVQVRPADSMSEYHFDLDGPEGTPFAAGRFHVALIFDEQYPEVPPK | GFFRTKIFHPNISERGDI                     |
| L.donovani      | 1   | MPLTAACMRRLMROMQEVEQEHFV                                                                 | DGVQVRPADSMSEYHFDLDGPEGTPFAAGRFHVALIFDEQYPEVPPK | GFFRTKIFHPNISERGDI                     |
| L.braziliensis  | 1   | MPLTAACMRRLMROMQEVEQEHFV                                                                 | DGVQVRPADSMSEYHFDLDGPEGTPFAAGRFHVALIFDEQYPEVPPK | GFFRTKIFHPNISERGDI                     |
| L.major         | 1   | MPLTAACMRRLMROMQEVEQEHFV                                                                 | DGVQVRPADSMSEYHFDLDGPEGTPFAAGRFHVALIFDEQYPEVPPK | GFFRTKIFHPNISERGDI                     |
| L.mexicana      | 1   | MPLTAACMRRLMROMQEVEQEHFV                                                                 | DGVQVRPADSMSEYHFDLDGPEGTPFAAGRFHVALIFDEQYPEVPPK | GFFRTKIFHPNISERGDI                     |
| T.cruzi         | 1   | MSICASAMRLMROMQEVEQEHFV                                                                  | DGVQVRPADSMSEYHFDLDGPEGTPFAAGRFHVALIFDEQYPEVPPK | GFFRTKIFHPNISERGDI                     |
| Arabidopsis_tha | 1   | EPCHIKKISISILSISLSSSSMASQSALLQKQLKDLCKHPVDGFSAGLVDEKNIFEWSVITICPPDTLYEGGFNAIMTFPQNYNS    |                                                 |                                        |
| Homo_sapiens    | 1   | MSGILSLRLAQEIKAWRKDHPPGFVAVPTKNDGTMNLMNNECAIPGKKGTPTNKGGLFKLRMLFKDDYSSSPPKC              | MFEPQLFHPNVYP                                   |                                        |
| Xenopus_laevis  | 1   | MAKKRIQKELMDLQRDPPAQCSAGPVGEDLFHWQATIMGPNDS                                              | FQGGVFFLTIFPTDYPPFKPKVAPTTKIYHPNINS             | SGICLDI                                |
| Oryctolagus_cun | 1   | MSTARRRLMRDFKRLQEDPPVGVSGAPSENNIMQWNAVIFGPEGTPFEDGTGFKLVIEFSEIYPNKKPTVRLSKMFPNPNVYADGSIC |                                                 |                                        |
| Crithidia_fasci | 1   | MPLTAACMRRLMROMQEVEQEHFV                                                                 | DGVQVRPADSMSEYHFDLDGPEGTPFAAGRFHVALIFDEQYPEVPPK | GFFRTKIFHPNISERGDI                     |
| Drosophila_mela | 1   | MTAPRRLRKELSDLQGNALKSFRDIKADDDNLLRWTLGLIVDNE                                             | PYNKGA                                          | FRIEINFPAEYPPKPPKINFKTRIYHPNIDEKGQVCLP |
| Mesocricetus_au | 1   | MSTPARRRLMRDFKRLQEDPPAGVSGAPSENNILVWNAVIFGPEGTPFEDVYADGSICLDILQNRWS                      | PTYDVSSILTSIQSLLEPNP                            |                                        |
|                 |     |                                                                                          |                                                 |                                        |
| L.infantum      | 96  | DWAPTLGLRHILVIRCLLIEPN                                                                   | ESALNEEAGRLILEEVAAYERKAAMYTAIN                  | AARPNGVPRFTLPEVQAEKASSLVTADASAPVAG     |
| L.donovani      | 96  | DWAPTLGLRHILVIRCLLIEPN                                                                   | ESALNEEAGRLILEEVAAYERKAAMYTAIN                  | AARPNGMPRFTLPEVQAEKASSLVTADASAPVAG     |
| L.braziliensis  | 96  | DWSSTLGLRHILAVIRCLLIEPN                                                                  | ESALNEEAGRLILEEVAATEERKAAMYTAIN                 | AARPNGVPRFTLSEAEKASRSATADISTGVDA       |
| L.major         | 96  | DWSPTLGLRHILVIRCLLIEPN                                                                   | ESALNEEAGRLILEEVAAYERKAAMYTAIN                  | AARPNGVPRFTLPEVKAEKASSVTACASAGAA       |
| L.mexicana      | 96  | DWSPTLGLRHILVIRCLLIEPN                                                                   | ESALNEEAGRLILEEVAAYERKAAMYTAIN                  | AARPNGVPRFTLPEVKAEKASSVTADASAPVNA      |
| T.cruzi         | 96  | DMKPSLGLRHILVIRCLLIEPN                                                                   | ESALNEEAGRLILEEVAAYERKAAMYTAIN                  | AARPNGVPRFTLPEVKAEKASSVTADASAPVNA      |
| Arabidopsis_tha | 96  | SDMHPNVSVDGRVCISILHPPGDDPSGYELASERWTPVHTVESIMLSIISMLSGPNDES                              | PANVEAAKEWRDKRDEFKKVSR                          | CVRKVS                                 |
| Homo_sapiens    | 96  | ILEEDKDWKPAITIKQILGLIQELLNEPNIQDPAQAEAYTIYCQNRVEYEKRVRA                                  | QAKKFA                                          | S-----                                 |
| Xenopus_laevis  | 96  | ALTYSKVLSLCSLLCDPNPDDPLVPEIAHTYKADREKYNRLAREWTQK                                         | AM-----                                         |                                        |
| Oryctolagus_cun | 96  | WSPTYDVSSILTSIQSLLEPNPNSPANQAAQLYQENKREYEKRVSAIVEQSWNDS                                  |                                                 |                                        |
| Crithidia_fasci | 96  | DWTPNVGLRHILAVIRCLLIEPN                                                                  | ESALNEEAGRLILEEVAATEERKAAMYTAIN                 | AARPDGAPRYTLPGEGRAPAATSAAPTAVSGG       |
| Drosophila_mela | 96  | KPATRTDQVVQALVDLINDPEPEHPLRAELAEEL                                                       | LKDRKKFVKNAEDYTKKHSEKRPAD                       | -----                                  |
| Mesocricetus_au | 96  | AAQLYQENKREYEKRVSAIVEQSWRDC                                                              | -----                                           |                                        |
|                 |     |                                                                                          |                                                 |                                        |
| L.infantum      | 191 | TAAASASSMANGSTPSTATRRLTLSEANCHPGAATAAEKAEKSKKKALRRI                                      | --                                              |                                        |
| L.donovani      | 191 | TAAASASSMANGSTPSTATRRLTLSEANCHPGAATAAEKAEKSKKKALRRI                                      | --                                              |                                        |
| L.braziliensis  | 191 | TAGASLSLTGDSVPSASARKLAPSEANCHRGPNAATDKVEKSKKKALRRI                                       | --                                              |                                        |
| L.major         | 191 | AAAAAASSMANGGAPSTATRGLTLSEANCHPGSATAAEKAEKSKKKALRRI                                      | --                                              |                                        |
| L.mexicana      | 191 | TPAASASSMANSSAPSTATRRLTLSEANCHPGSATAAEKAEKSKKKALRRI                                      | --                                              |                                        |
| T.cruzi         | 191 | SEGFVSSQLRNASESALNKRSVAVSGTSTNVVASKKAVEKKRAALKRRI                                        | -----                                           |                                        |
| Arabidopsis_tha |     | -----                                                                                    |                                                 |                                        |
| Homo_sapiens    |     | -----                                                                                    |                                                 |                                        |
| Xenopus_laevis  |     | -----                                                                                    |                                                 |                                        |
| Oryctolagus_cun |     | -----                                                                                    |                                                 |                                        |
| Crithidia_fasci | 191 | SRLTPSEANCHPGSAAAADKVEKSKKEAEKSKKKALRRI                                                  | -----                                           |                                        |
| Drosophila_mela |     | -----                                                                                    |                                                 |                                        |
| Mesocricetus_au |     | -----                                                                                    |                                                 |                                        |

**Figure S1.** Comparative alignment of the primary structure of the LiUBC1 protein. The degree of conservation is represented in gray scale both in species of the trypanosomatid family and in different eukaryotes.

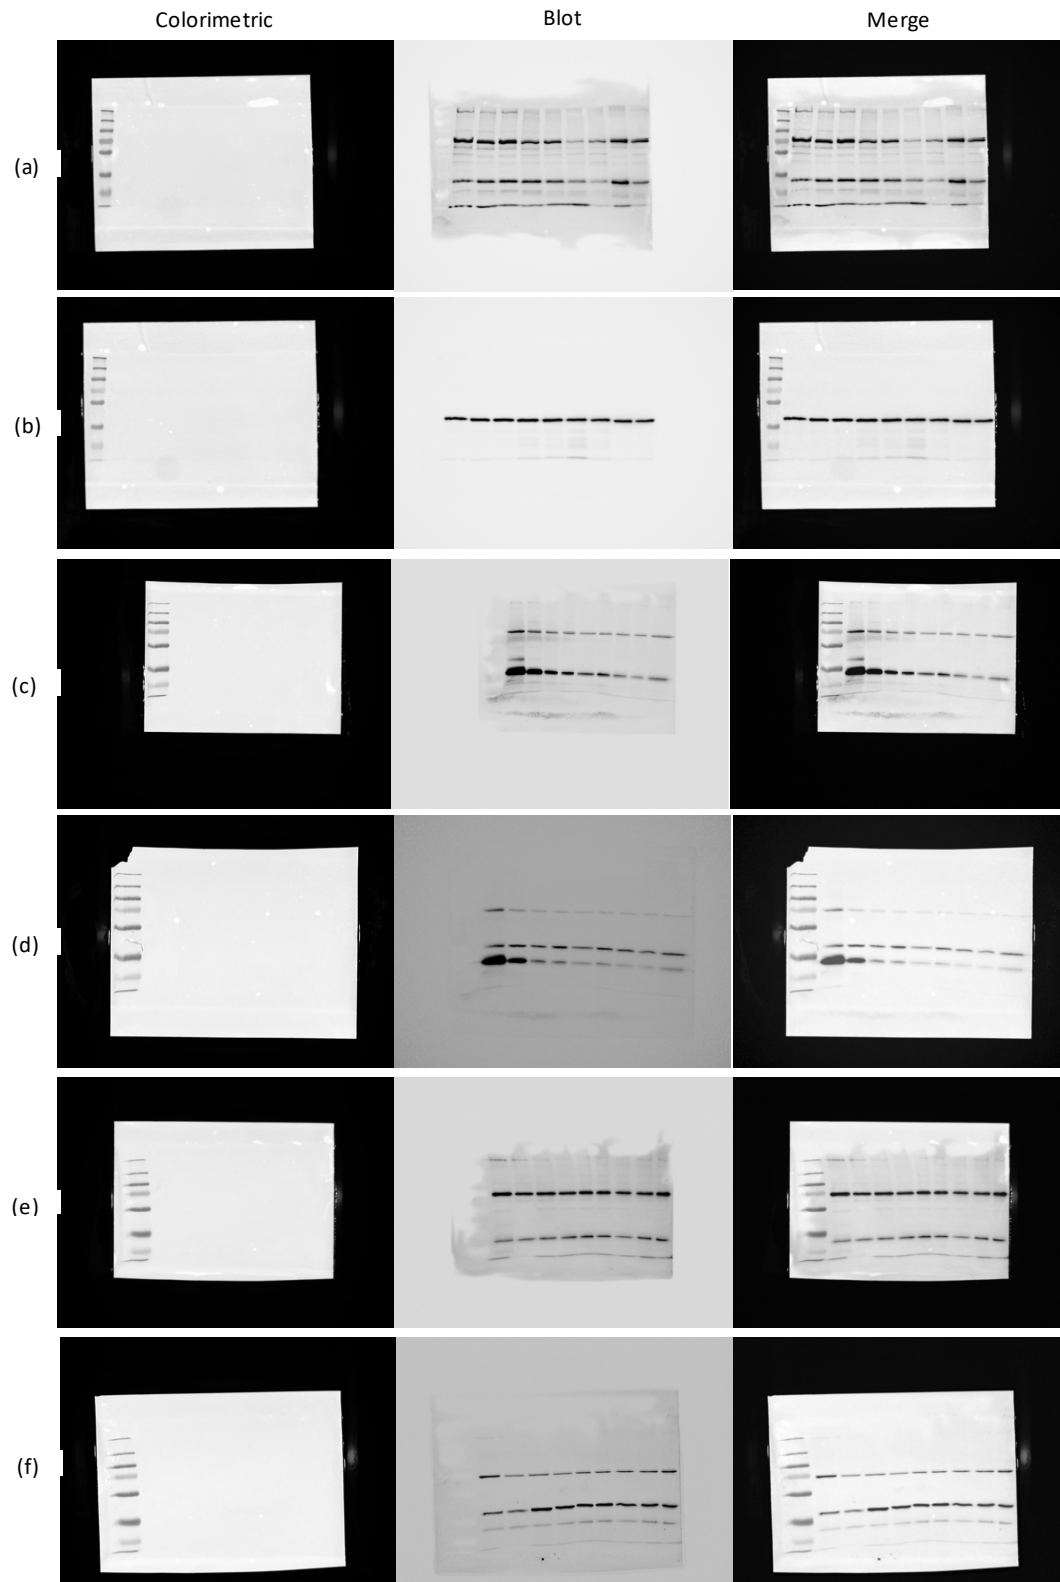

**Figure S2.** Raw Western Blot Images. Densitometry readings are in supplementary materials. **(a)** LiUBC1 expression pattern corresponding Figure 4(b) **(b)** LiUBC1 expression pattern antiGAPDH corresponding Figure 4(b) **(c)** Western blot pattern of the LiUBC1 protein throughout growth of pIRmcs3 control transfectants corresponding to Figure 7(b) **(d)** Western blot pattern of the LiUBC1 protein throughout growth of pIRmcs3 control transfectants antiGAPDH corresponding to Figure 7(b) **(e)** pIRmcs3-LiUBC1 knock-in promastigotes corresponding to Figure 7(c) **(f)** pIRmcs3-LiUBC1 knock-in promastigotes antiGAPDH corresponding to Figure 7(c).
